1 **A survey of Chinese pig farms and human healthcare isolates reveals separate human**  
2 **and animal MRSA populations**

3 Geng ZOU<sup>1</sup>, Marta MATUSZEWSKA<sup>2</sup>, Ming JIA<sup>1</sup>, Jianwei ZHOU<sup>1</sup>, Xiaoliang BA<sup>2</sup>, Juan DUAN<sup>1</sup>, Caishi  
4 ZHANG<sup>3</sup>, Jian ZHAO<sup>1</sup>, Meng TAO<sup>1</sup>, Jingyan FAN<sup>1</sup>, Xiangming ZHANG<sup>4</sup>, Wenping JIN<sup>4</sup>, Tianpen CUI<sup>5</sup>,  
5 Xianyu ZENG<sup>5</sup>, Min JIA<sup>5</sup>, Xiaojuan QIAN<sup>6</sup>, Chao HUANG<sup>1</sup>, Wenxiao ZHUO<sup>1</sup>, Zhiming YAO<sup>1</sup>, Lijun  
6 ZHANG<sup>1</sup>, Shaowen LI<sup>1</sup>, Lu LI<sup>1,7,8</sup>, Qi HUANG<sup>1,7,8</sup>, Bin WU<sup>1,7,8</sup>, Huanchun CHEN<sup>1,7,8</sup>, Alexander W. TUCKER<sup>2</sup>,  
7 Andrew J. GRANT<sup>2</sup>, Mark A. HOLMES<sup>2\*</sup> & Rui ZHOU<sup>1,7,8\*</sup>.

8 <sup>1</sup> State Key Laboratory of Agricultural Microbiology, Huazhong Agricultural University College of Veterinary  
9 Medicine, Wuhan 430070, China;

10 <sup>2</sup> Department of Veterinary Medicine, University of Cambridge, Cambridge, UK;

11 <sup>3</sup> Jianli People's Hospital, Jianli 433300, China;

12 <sup>4</sup> Wuhan Third Hospital, Wuhan 430060, China;

13 <sup>5</sup> Wuhan First Hospital, Wuhan 430014, China;

14 <sup>6</sup> Huangmei People's Hospital, Huangmei 435500, China

15 <sup>7</sup> Cooperative Innovation Center of Sustainable Pig Production, Wuhan 430070, China

16 <sup>8</sup> International Research Center for Animal Diseases (MOST), Wuhan 430070, China

17

18 \*Corresponding authors: rzhou@mail.hzau.edu.cn (Rui Zhou); mah1@cam.ac.uk (Mark A. Holmes)

## 19 **Abstract**

20 There has been increasing concern that the overuse of antibiotics in livestock farming is contributing to the  
21 burden of antimicrobial resistance in people. Farmed animals in Europe and North America, particularly pigs,  
22 provide a reservoir for livestock-associated methicillin-resistant *Staphylococcus aureus* (LA-MRSA, ST398)  
23 found in people. This study was designed to investigate the contribution of MRSA from Chinese pig farms to  
24 human infection and carriage. A collection of 603 *S. aureus* were isolated from 55 pig farms and 4 hospitals  
25 (MRSA= 285, 198; MSSA= 50, 70) in central China, a high pig farming density area, during 2017-2018. CC9  
26 MRSA accounting for 93% of all farm MRSA isolates, while no was found in hospitals. ST398 isolates were  
27 found on three farms (n = 23) and three hospitals (n = 12). None of the ST398 from this study belong to the  
28 livestock clade of the LA-MRSA commonly found in Europe and North America. The hospital ST398 MRSA  
29 isolates formed a clade that was clearly separate from the farm ST398 MRSA and MSSA isolates, and all  
30 possessed human immune evasion cluster genes which were absent from all the pig farm ST398 isolates.  
31 Despite the presence of high levels of MRSA found on Chinese pig farms we found no evidence of them spilling  
32 over to the human population. Nevertheless, the ST398 MRSA obtained from human samples appear to be part  
33 of a widely distributed lineage in China. And the new animal adapted ST398 lineage that emerged in China  
34 should also be alarmed.

35

## 36 **Importance**

37 We disclosed the fact that although the high MRSA positive rate in Chinese hospitals and pig farms should be  
38 alarmed, they might be two separate issues. The new CC398 clades we identified highlight that the host adaption  
39 of the MRSA lineage is kept changing. These results suggest that continued surveillance of MRSA in livestock  
40 is necessary. We found that the pig farm MRSA isolates had unique antimicrobial resistance genes while most  
41 of the hospital MRSA isolates had human immune evasion cluster genes. These features could be used to  
42 distinguish the pig farm associated *S. aureus* in clinical laboratories. The policies of reducing antimicrobials use  
43 in livestock were implemented in China since 2020. Our study described the situation of MRSA populations in  
44 pig farms and hospitals in Central China before 2020, which provides a potential opportunity for future studies  
45 to evaluate the effects of the policies.

## 46 Introduction

47 *Staphylococcus aureus* (*S. aureus*) is an opportunist human pathogen that can also colonize and infect many  
48 species of animals and adapt to diverse environmental conditions<sup>1</sup>. Methicillin-resistant *S. aureus* (MRSA) are  
49 *S. aureus* lineages that have acquired the *mecA* or *mecC* genes through horizontal gene transfer which makes  
50 them highly resistant to nearly all  $\beta$ -lactam antibiotics<sup>2</sup>.

51 The zoonotic potential of MRSA in livestock and wild animals has been widely reported<sup>3</sup>. An early report of  
52 livestock associated MRSA (LA-MRSA) described an infection in a baby living on a farm where the pigs were  
53 infected with MRSA Sequence Type (ST)398, in the Netherlands in 2005<sup>4</sup>. This LA-MRSA lineage is now  
54 widely distributed in pigs and other farm animal populations in Europe and North America<sup>5,6</sup>. A recent national  
55 report of AMR in Denmark gave the prevalence of LA-MRSA in finishing pigs in randomly selected herds as  
56 88% with ST398 accounting for 16% of all human MRSA infections which raises considerable concerns about  
57 antibiotic stewardship in agriculture and the threat to public health<sup>7</sup>.

58 Phylogenetic studies have shown that LA-MRSA ST398 originated from a human MSSA lineage and jumped to  
59 livestock, acquiring tetracycline and methicillin resistance<sup>8,9</sup>. These two clades can be distinguished on the basis  
60 of canonical single-nucleotide polymorphisms (SNPs)<sup>10</sup>.

61 The LA-MRSA clonal lineage most frequently reported in Asian livestock is ST9 with closely related isolates  
62 from people and livestock reported in the literature<sup>11,12</sup>. This ST is also common in European and North  
63 American pig farms almost exclusively as a MSSA. The origins of this lineage are unclear although it is  
64 common in historic collections of livestock isolates suggesting an animal origin<sup>13,14</sup>.

65 In addition to ST398 and ST9 MRSA, among other lineages (CC1, CC5, CC8, CC59, CC97, CC130 and  
66 CC425) have been found in livestock with evidence that they are also involved in zoonotic or anthroponotic  
67 transmission (host switching)<sup>15,16</sup>.

68 Previous studies looking at LA-MRSA in China have shown that ST9 is the dominant lineage in pigs with  
69 ST398 MRSA being less commonly detected<sup>17,18,19</sup>. Studies of human isolates have identified ST398 MRSA as  
70 a cause of significant disease in patients from Chinese hospitals<sup>20</sup>. Genomic studies of human isolates have  
71 indicated that some of these isolates are from the human ST398 lineage having acquired a *mecA* gene in a  
72 distinctive SCC*mec* V variant<sup>21</sup>.

73 In order to assess the contribution of pig farms to the human burden of MRSA, a study was designed to enable a  
74 genomic study of MRSA isolates from human and animal hosts. Isolates of *S. aureus* were collected  
75 contemporaneously from pig farms and hospitals in the same region in China and subjected to DNA sequencing.

76 A phylogenetic analysis was performed in order to establish if the human isolates were likely to be of livestock  
77 origin.

78

## 79 **Results**

### 80 **The MRSA populations of pig farms and hospitals consisted of different clonal lineages**

81 In the samples collected from 55 pig farms (pig nasal swabs = 2416, farm worker nasal swabs = 361, pig farm  
82 dust samples = 291), 335 *S. aureus* isolates were identified and sequenced (based on phenotypic antibiotic  
83 susceptibility 285 of them were MRSA). MRSA were isolated from 34/55 pig farms (62%). CC9 MRSA were  
84 present in all positive farms where more than one MRSA isolate was obtained and accounted for 97% (277/285)  
85 of all farm MRSA isolates. ST398 isolates were found on 3 farms: one ST398 MRSA was isolated from a farm  
86 worker on one farm, two ST398 MRSA isolates were obtained from a pig from another farm, and a number of  
87 ST398 MSSA were isolated from pigs, environmental samples and a farm worker on the third farm. The  
88 remaining 5 farm MRSA isolates comprised one ST1 (from a pig sample) and 4 ST59 (1 from a pig and 3 from  
89 farm worker swabs) (Figure S1, Table S1). 50 MSSA pig farm isolates included 16 ST9, 5 ST1, 4 ST5, 20  
90 ST398, and 5 ST128. (Table 1).

91 A total of 268 *S. aureus* isolates were collected from four hospitals (MRSA = 198, MSSA = 70) and 39 different  
92 STs were identified. The three most common STs in the hospital MRSA populations were ST59 (66/198),  
93 ST239 (42/198) and ST45 (17/198). Five ST398 MRSA isolates were identified from three hospitals, including  
94 two city hospitals and a county hospital, seven ST398 MSSA isolates were also identified in the county hospital  
95 (Table 1). Notably there were no ST9 isolates (MRSA or MSSA) found in the Chinese hospitals.

96

### 97 **Phylogenetic analysis identifies separate human and livestock ST398 clades in China.**

98 Phylogenetic studies can provide evidence about the population structure and rates of transmission between  
99 different hosts. Where genomes from different hosts are mixed in each clade, this indicates jumps between host  
100 species. Where strains from different hosts form distinct clades, this suggests that distinct populations are being  
101 maintained in different hosts, and that host jumps are rare<sup>16</sup>. A phylogenetic analysis was performed to examine  
102 the population structure of ST398. A total of 115 Chinese CC398 isolates, including 36 isolates from this study,  
103 37 isolates collected from NCBI genome database and 42 isolates from hospital patients collected in a previous  
104 study<sup>21</sup> were used to create an alignment against the reference genome 0213-M-4A (a finished pig ST398  
105 MRSA genome generated in this study) from which a maximum likelihood tree was constructed (Figure 1).

106 With the exception of 4 MSSA from pigs in eastern China (Clade C-PL), all the Chinese CC398 MRSA and  
107 MSSA isolates (from both livestock and humans) were shown to fall within the diversity of the previously  
108 identified ‘human’ lineage as defined by the published canonical SNPs (Figure 1). The Clade C-PL isolates are  
109 contained within the previously identified ‘livestock’ lineage and carry a *tetM* gene which is associated with the  
110 ‘livestock’ lineage<sup>8</sup>. All the human hospital MRSA ST398 isolates from this study formed a discrete cluster with  
111 other MRSA in the collection from a broad geographical range in China (Clade C-HM). No pig farm (or other  
112 animal) isolates contributed to this clade and they all possessed a full set of the human immune evasion cluster  
113 genes. The pig farm ST398 MRSA isolates fell within the diversity of another separate clade (Clade C-L) which  
114 was comprised of the majority of animal MSSA isolates together with some human MSSA isolates and 5 MRSA  
115 (1 farm worker from this study 4 from pigs). All isolates in Clade C-L lacked a full set of the human immune  
116 evasion cluster genes and contained a characteristic set of antimicrobial resistance genes (see below). The pig  
117 farm MSSA CC398 isolates identified in this study (which all came from a single farm) clustered within Clade  
118 C-L. The 8 hospital MSSA CC398 isolates from this study belonged to 2 separate clades (Clade C-H2 and C-  
119 H3). Three isolates (JL116, JL108 and JL84) were in the Clade C-H2 separated from most of the other human  
120 MSSA. Two (JL42 and JL73) of the other 5 isolates fell in the Clade C-H3-1 containing human hospital MRSA  
121 (Clade C-HM) from this study suggesting that *SCCmec* had been acquired by this human-adapted lineage. Two  
122 (JL113 and JL63) of the remaining 3 isolates belonged to the Clade C-H3-2 consisting entirely of human MSSA  
123 which had a relatively close relationship to the ‘livestock’ lineage (Clade C-PL).

124 A time-measured phylogenetic tree using an international collection of ST398 isolates was created using  
125 BEAST1.8.2<sup>22</sup>. After removing all isolates without date, host, and location information in the selection process  
126 (see methods), a total of 207 ST398 isolates (11 from this study, and 196 from the NCBI genome collection)  
127 were used for the analysis. The collection included isolates collected from around the world over the last 15  
128 years. A time annotated tree is shown in Figure 2. The tree shows an ancestral clade at the base of the tree  
129 consisting of mainly human MSSA ST398 isolates from Europe and North America, which also includes a  
130 Chinese clade (Clade C-H1). The well documented prevalent LA-MRSA clade (the ‘livestock’ clade; possessing  
131 the appropriate canonical SNPs) appears to be the most recently emerged clade. It includes just 2 Chinese  
132 isolates (from the Clade C-LP in Figure1) from pigs and is defined by a most recent common ancestor (MRCA)  
133 dating back to 1964 (95% highest posterior density interval [HPD] = [1956, 1972]). With a MRCA estimate of  
134 1940 (95%HPD = [1926, 1954]) the vast majority of Chinese isolates and the ‘livestock’ clade emerged from  
135 the ancestral ST398 clade. Three Chinese clades (Clade CH2, C-L and C-H3) all appear to separate at the same

136 time with the MRCA dated at 1950 (95%HPD = [1938, 1961]). Clade C-H2 consists mainly of human MSSA,  
137 clade C-L consists mainly of livestock MSSA (but also contains 2 MRSA from farms in this study), and clade  
138 C-H3 consists of another clade of human MSSA (Clade C-H3-1) from which emerges with the MRCA  
139 estimated at 2002, (95%HPD = [1999, 2005]) the clade of human hospital MRSA (Clade C-HM). An additional  
140 human MSSA Chinese clade (Clade C-H3-2) shares a MRCA with the ‘livestock’ clade dated at 1956  
141 (95%HPD = [1946, 1966]).

142

### 143 **The pig farm CC9 MRSA may be of importance to public health**

144 The phylogenetic tree of CC9 *S. aureus* from this study and previous studies roughly separates into three CC9  
145 populations (Figure 3). Towards the root of the tree there is a clade of genomes that possess human immune  
146 evasion cluster (IEC) genes (*chp*, *scn* and *sak*) that includes two human clinical MRSA isolates from Chinese  
147 Taiwan with a *SCCmec* V variant. The vast majority of Chinese isolates form a "China pig-farm" clade, are  
148 mostly of animal origin, and lack the IEC genes. The China pig-farm clade shares a MRCA with a North  
149 American/European clade (the third population which includes an MRSA lineage with a type IVb *SCCmec*. The  
150 China pig-farm clade isolates are almost all MRSA with *SCCmec* XII and this clade contains all isolates from  
151 this study (145 included in this tree). In this clade, of the 45 isolates from other studies, nine were from human  
152 clinical cases. As the absence of human IEC genes and the possession of the farm associated antimicrobial  
153 resistance genes (ARGs) (*tetL*, *fexA* and *aac6-Aph2*) is a consistent feature in this clade it seems likely that the  
154 human clinical isolates probably originated from livestock as it is clear this lineage is found in human carriage  
155 samples including farm workers. Notably, there was a single isolate with the human IEC genes isolated from a  
156 bacteraemia in a patient from a hospital in Hangzhou (East China)<sup>23</sup>. Within the phylogeny this isolate is  
157 surrounded by pig farm isolates from this study.

158

### 159 **Different patterns of antimicrobial resistance and virulence genes from pig farms and hospitals**

160 An examination of ARGs and selected virulence factors (VFs) in *S. aureus* sequence data showed that 3 ARGs  
161 were frequently found in pig farm isolates (PFA-ARGs), *aac6-Aph2* (aminoglycosides ARG)<sup>24</sup>, *fexA* (phenicols  
162 ARG)<sup>25</sup> and *tetL* (tetracyclines ARG)<sup>26</sup>; and 3 VFs frequently found in hospital isolates (HA-VFs), *scn*  
163 (*Staphylococcal* complement inhibitor)<sup>27</sup>, *sak* (staphylokinase)<sup>27</sup> and *sprD* (small pathogenicity island RNAs)<sup>28</sup>  
164 (Figure S2). The PFA-ARG *aac6-Aph2* was present in 9/10 clonal lineages of the pig farm MRSA population  
165 (98% of pig farm MRSA isolates). It was also found in 5/24 clonal lineages from hospital MRSA isolates

166 particularly in ST239 (41/42) and ST5 (11/16). The ARGs, *fexA* and *tetL*, were not present in hospital MRSA  
167 isolates (Figure 4). The HA-VF *sak* was found in 76% (150/198) of hospital MRSA isolates accounting for  
168 20/24 clonal lineages while 82% (162/198) harboured *scn* and 83% (164/198) harboured *sprD*. The HA-VFs  
169 were only present in ST1 and ST59 pig farm MRSA isolates, mostly from farm worker samples. In comparison  
170 to ST398 MRSA isolates from patients, ST398 isolates from pig and farm worker samples possessed ARGs  
171 *aac6-Aph2* and *tetL* but lacked HA-VFs. The single pig ST1 MRSA isolate in the collection harboured PFA-  
172 ARGs *aac6-Aph2* which was not present in the hospital ST1 MRSA isolates. Except that a couple of (2/66)  
173 hospital ST59 MRSA isolates carried the *aac6-Aph2*, no other PFA-ARG was detected in ST59 MRSA isolates.  
174 HA-VF *sak* was not detected in pig ST59 MRSA isolate nor in 11/66 hospital ST59 MRSA isolates (Figure 4).

175

### 176 **Mobile genetic elements harboured by MRSA ST398 isolates from pig farms and hospitals.**

177 An examination of the genomic context of the PFA-ARGs and HA-VFs is illustrated in Figure 5A.

178 A transposon, Tn558, harbouring *fexA* was detected in the pig farm MSSA ST398 isolate, but not in the pig farm  
179 MRSA ST398 isolates or the hospital ST398 isolates. Tn558 could be found in all (313/313) of the *fexA* positive  
180 isolates isolated for this study.

181 A putative genetic resistance island, GI-PF1, carrying the ARGs *tetL* and *aac6-Aph2* as well as the erythromycin  
182 resistance gene *ermB*, appeared to be present in all the pig farm ST398 isolates, but not in any hospital isolates.  
183 The ST1 MRSA isolate from the pig sample carried copies of *aac6-Aph2* as well as *ermB*, which was located on  
184 a plasmid (Figure 5B). A part of this plasmid which included the *aac6-Aph2* and *ermB* genes was identical to  
185 part of GI-PF1, suggesting a shared origin. The shared region (region 2, Figure 5A) contains *ermB* and *aac6-*  
186 *Aph2*, different kinds of transposases such as the Tn3 family transposase and transposase IS1216 as well as the  
187 putative transposon Tn552 DNA-invertase *bin3*. One side of the shared region (region 1) contains genes of a  
188 tetracycline efflux MFS transporter (*tetL*), a plasmid recombination/mobilization protein (*pre/mob*) and a  
189 plasmid replication protein (*repU*). The remaining part of the island, region 3, has the cadmium resistance  
190 *cadDX* operon and the *cst* operon functioning as hydrogen sulfide detoxification. Besides the IS1182 family  
191 transposase genes, DNA-invertase gene *hin* and Tn552 DNA-invertase gene *bin3* were also detected in region 3.  
192 GI-PF1 region 1 could be detected in 98% (312/318) of *tetL* positive isolates. The distribution of GI-PF1 in the  
193 ST398 phylogeny is included in Figure 1.

194 The HA-VFs *sak*, *sprD* and *scn* as well as the virulence gene *chp* (chemotaxis inhibitory protein), were located  
195 in a prophage region designated phiH1, which has a high level of identity with the  $\phi 3$  phage, *Staphylococcus*

196 phage 23MRA (KJ452292.1, 99.43% identity, 89% coverage). The phiH1 prophage could be detected in 54%  
197 (144/268) of hospital isolates, but not in pig farm isolates other than the five ST1281 isolates (CC20, all MSSA,  
198 one from a farm worker and four from pigs on the same farm).

199 The MRSA ST398 isolates from pig farms and hospitals had different SCC*mec* elements which are labelled PF-  
200 SCC and H-SCC respectively are illustrated in [Figure 6](#). The H-SCC had high similarity with the associated  
201 portions of the type V-VT SCC*mec* of the CA-MRSA ST59 JCSC7190 isolate from Chinese Taiwan (98.89%  
202 identity) and the type Vc SCC*mec* of the LA-MRSA ST398 reference strain S0385 (98.83% identity). In  
203 comparison to the previously reported similar SCC*mec* elements, the PF-SCC appeared to have resulted from a  
204 homologous recombination event between the type-IX SCC*mec* of a ST398-t034 MRSA JCSC6943 (Genbank:  
205 AB505628.1) from Thailand, and a ST398-t034 MRSA RIVM3897 (Genbank: CP013621.1) from the  
206 Netherlands. PF-SCC was detected in all three ST398 MRSA isolated from pig farms. The J1 region of PF-SCC  
207 had the genes for the type I restriction and modification system, *hsdR*, *hsdS*, and *hsdM*, while its J2 region had  
208 the *cadDX* operon, *arsRBC* operon and the copper-transporting ATPase gene *copB*.

209

## 210 **Discussion**

211 The striking finding from this study was the discovery that MRSA were present in such a high proportion of pig  
212 farms while at the same time there was no evidence of shared populations of MRSA in human and animal hosts.  
213 This provides evidence for the potential for these farms to be a source of antibiotic resistant *S. aureus* for human  
214 infection in China as is the case for LA-MRSA in Europe but no evidence that LA-MRSA are being found in the  
215 human healthcare system in China. In Europe, other than a few countries with low MRSA like Norway and  
216 Ireland, LA-MRSA are well established in pig farms with farm level prevalence rates between 25.4% and  
217 100.0%<sup>29,30,31</sup>. These rates are comparable with the MRSA prevalence found in this study although they result  
218 from ST398 rather than CC9. Lower rates of CC9 MRSA have been seen in previous studies of Chinese pig  
219 farms and slaughterhouse workers<sup>18,32</sup>. While ST398 was found on 3 Chinese pig farms, it was only well  
220 established on a single farm as a MSSA lineage. All the ST398 isolates from this study belong to a lineage  
221 distinct to the LA-MRSA lineage prevalent in the Europe. Interestingly, this ST398 lineage has been previously  
222 been found in China ([Figure 1](#))<sup>19</sup> but doesn't appear to have become established. In comparison, CC9 was the  
223 dominant *S. aureus* lineage and appears well established in the majority of pig farms from this study, suggesting  
224 that CC9 has a competitive advantage over ST398 in the Chinese pig farm environment. CC9 MSSA isolates  
225 are not uncommon in European livestock with small numbers of CC9 MRSA reported<sup>29</sup>, suggesting that the



226 reverse is true there. Further investigations into those differences may provide useful insights into the factors  
227 driving host species adaptation which enable LA-MRSA to become established in pig herds.

228 It is not surprising that out of 42 farm workers carrying MRSA all but 4 carried CC9 MRSA. As is seen in  
229 ST398 LA-MRSA, this carriage is likely to be transient, but it does demonstrate how these CC9 MRSA can  
230 easily spread from farms to the wider human population. It was therefore surprising not to find any CC9 MRSA  
231 among the MRSA isolates collected from the 4 collaborating hospitals in the same region as the farms. It should  
232 be noted that it is possible that a larger, more rigorous, or more systematic sampling framework might have  
233 found more hospital isolates that might have provided evidence of overlapping populations, in other words,  
234 ‘absence of evidence’ is not the same as the ‘evidence of absence’.

235 Both MRSA and MSSA ST398 were found in the farms and among the hospital isolates which on the basis of  
236 MLST suggested that there may have been movement of this lineage between the animal and human  
237 populations. The phylogeny of the ST398 isolates in this study together with the wider collection of ST398 *S.*  
238 *aureus* genomes revealed that the hospital ST398 MRSA (C-HM) comprised a separate population to those  
239 found on the pig farms (C-L) (Figures 1, and 2). The clade C-HM is widely distributed throughout China  
240 including isolates from Central, Eastern and Southern regions of the country. The pig farm ST398 MRSA  
241 isolates fall within the diversity of the clade C-L consisting mainly of other livestock isolates from China,  
242 predominantly MSSA. The livestock ST398 MSSA came from a single pig farm and were also part of this clade.  
243 The hospital ST398 MSSA fall in the diversity of another separate clade. The conclusion from this phylogenetic  
244 study is that the animal and human populations of ST398 *S. aureus* in China belong to distinct lineages and  
245 there is no evidence that either of the MRSA lineages found on farms is contributing to human MRSA carriage  
246 or infection.

247 The time-scaled phylogeny of an international collection of ST398 isolates (Figure 2) provides a global context  
248 revealing the likely evolution of this sequence type. Previous studies had indicated that the prevalent LA-MRSA  
249 ST398 lineage had arisen from a human adapted MSSA, become livestock adapted, acquired *SCCmec* and  
250 became established on livestock farms, particularly in pig herds<sup>8</sup>. This study shows that the prevalent LA-  
251 MRSA shares a common ancestor with a Chinese human MSSA clade (Clade C-H3-2), and that these clades  
252 share a common ancestor with the human MSSA clade (Clade C-H3-1) that gave rise to the ST398 MRSA clade  
253 (Clade C-HM) from which the hospital isolates from this study came. This topology revealed the diversity of  
254 ST398 lineage in Chinese human community and farm animals, highlighting the concern of the emergence of  
255 new prevalent CC398 lineages. Given that East Asia was the part of the world where the extant ancestors of the

256 domesticated pig came from, it is possible to speculate that these animals may have been involved in the  
257 evolution of this bacterial species.

258 The investigation of ARGs and VFs identified genes that characterised the MRSA found on farms and in human  
259 hospitals. As other studies have found, the human immune evasion cluster of genes found on the  $\phi 3$  phage  
260 appear to associate strongly with the source of the isolate being human (238/268 hospital isolates carried at least  
261 one of the genes). Similarly, the ARGs *tetL*, *fexA* and *aac6-Aph2* were strongly associated with a farm origin  
262 (322/335 pig farm isolates carried at least one of the genes). Part of this may be a simple consequence of clonal  
263 expansion from different founder populations but the identification of a genomic resistance island region  
264 containing *aac6-Aph2* and *ermB* in most farm isolates which is identical to a region of a plasmid carried by a  
265 ST1 MRSA isolate from a pig shows how readily ARGs can move within *S. aureus* populations. The  
266 consistency and persistence of both the PF-ARGs and the HA-VFs also indicate a continued selection pressure  
267 for the retention of these genes. Examination of the SCC*mec* elements also revealed some consistent differences  
268 between the human and pig farm ST398 MRSA. The SCC found in the hospital isolates (the H-SCC in [Figure](#)  
269 [6](#)) was a truncated version of a variant of a Type V SCC*mec*. The source could have been type V-VT (sequence  
270 from a ST59 CA-MRSA isolated from Chinese Taiwan) or type Vc (5C2&5) (sequence from an ST398 LA-  
271 MRSA isolated from the Netherlands). The truncation results in a length of the SCC*mec* which is typical of  
272 SCC*mec* types that are associated with CA- MRSA<sup>21,33</sup>. The SCC*mec* found in the farm ST398 MRSA may have  
273 resulted from a recombination of ST398 associated SCC*mec* type IX and one found in the isolate RIVM3897 (a  
274 human ST398 isolate from the Netherlands). These distinctive SCC*mec* types may provide useful population  
275 markers as they currently seem to be restricted to two Chinese clades at present.

276 In conclusion, the presence of such high levels of MRSA isolates on pig farms is of considerable concern. The  
277 most likely driver of this is the overuse of antimicrobials in livestock which has been identified as an issue in  
278 China<sup>34,35</sup>. Fortunately, this study found no evidence that MRSA from pig farms were contributing to the  
279 burden of human MRSA found in samples submitted to clinical microbiology laboratories and while ST398  
280 MRSA were found in farms and hospitals there was no shared population that would indicate that transmission  
281 had occurred.

282

## 283 **Methods**

### 284 **Sample collection**

285 Fifty-five pig farms within a 200 km radius of Wuhan City in central China were visited during 2017-2018. For  
286 each pig farm, nasal swabs of sows, fattening pigs and farm workers, as well as dust samples were collected. If  
287 there were sufficient pigs available on each pig farm, at least 6 sows and 20 fattening pigs were randomly  
288 selected and sampled (all the pigs on the farm were sampled if numbers were lower than this). All consenting  
289 farm workers were sampled anonymously. Nasal swabs were collected using a transport medium (COPAN  
290 Diagnostics Inc.). Environmental dust samples were collected using the following method. Three or four sterile  
291 tubes containing 10 ml sterilized Mueller Hinton broth (Oxoid, Ltd.) supplemented with 6.5 % NaCl were  
292 opened and exposed in the environment of each selected pig house for at least 10 mins before resealed.  
293 Two city hospitals and two county hospitals in the same region were included in this study. The collaborating  
294 hospitals retained all clinical MRSA isolates (for the county hospital H3, MSSA isolates were also retained) that  
295 had been identified in the course of normal clinical diagnostics during the same period as the pig farm sampling.  
296 The sampling of animals and people complied with protocols subject to ethical review by Huazhong  
297 Agricultural University (for pig sampling: HZAUSW-2016-013; for human sampling: HZAUHU-2016-006).

#### 298 ***S. aureus* isolation and identification**

299 All nasal swabs and dust samples were cultured in Mueller Hinton broth with 6.5 % NaCl, at 37°C for 16 h with  
300 shaking. For each culture, a full loop of the culture was spread onto MRSA selective plate (CHROMagar  
301 Chromogenic Media) and incubated at 35°C for 24 h. Putative MRSA colonies on the selective plate appeared to  
302 be pink coloured. For each sample, up to 3 pink colonies were selected for further isolation and identification.  
303 The MRSA candidate isolates were biochemically profiled using the Phoenix 100 ID/AST System (BD  
304 Biosciences); those with positive results were stored as MRSA isolates. All the identified *S. aureus* isolates were  
305 further sequenced. The species and AST of clinical *S. aureus* isolates obtained from hospitals were also checked  
306 using the Phoenix 100 ID/AST System.

#### 307 **Genome sequencing, assembly and annotation**

308 Genomic DNA was prepared from all the isolates grown overnight at 37°C in tryptone soy broth (BD  
309 Biosciences), using bacterial DNA kits (Omega Bio-Tek). All genomic DNA samples were qualified with an  
310 optical density at 260 nm ( $OD_{260nm}/OD_{280nm}$ ) ratio between 1.8 and 2 (NanoDrop; Thermo Scientific). Genomic  
311 DNA (typically 500 ng) was used to prepare multiplexed libraries for sequencing on Illumina HiSeq 2000  
312 instruments operated according to the manufacturer's instructions with 100 cycle paired-end runs. For all the  
313 sequenced genomes, Fastq\_screen<sup>36</sup> was used to map the raw reads to the most common laboratory  
314 contaminants to check for contamination as well as published genomes of *S. aureus* to confirm that all isolates

315 are identified as *S. aureus*. Genome assemblies of all the isolates were generated using SPAdes 3.11.1<sup>37</sup>.  
316 Assemblies with an N50 less than 15,000 were discarded. For assembled data, CheckM (version 1.0.13)<sup>38</sup> was  
317 used to analyse the contamination of assembled genomes, the genomes with higher than 1.0% contaminated and  
318 0% strain heterogeneity were excluded. For the six isolates selected for complete genome sequencing, the  
319 hospital isolates JL42, JL28 as well as the pig farm isolates 0213-M-4A, 0610-H-2A and 0316-H-5A were  
320 further sequenced with Nanopore instruments, while the hospital isolate S82 was sequenced with Pacbio  
321 instruments. The sequencing procedures were carried out following the manufacturer's instructions.  
322 Unicycler(0.4.8)<sup>39</sup> was used for complete genome assembly, the Illumina sequencing data were used as short  
323 reads files and the Nanopore (Pacbio) sequencing data were used as long read files. For the parameters used in  
324 Unicycler, the Bridging mode chosen was Normal, which means moderate contig size and mis-assembly rate,  
325 and the expected linear sequence number was set to 0.

326 For all assembled genomes, Prokka (version 1.12)<sup>40</sup> was used for genome annotation.

### 327 **Antimicrobial resistance genes identification**

328 The antimicrobial resistance gene (ARG) database ARG-ANNOT (version 4.0)<sup>41</sup> was used for ARGs screening.  
329 BLAST+<sup>42</sup> was used for mapping with the annotated genomes for the identification of ARGs. Sequences with a  
330 homology of 90% and an alignment length of 80% of the corresponding reference gene were considered alleles.

### 331 **Virulence factors and host-specific genes identification**

332 A database of 216 reported virulence factors (VFs), including virulence, host-specific and other associated genes  
333 was created using published research (Table S3). For the sequences mapped to the genes in the database with  
334 BLAST+, homology of 90% and an alignment length of 80% were used as cut off value for identification.

### 335 **Determination of the pig farm and hospital associated VFs or ARGs**

336 All the *S. aureus* isolates, both MRSA and MSSA, were included in the analysis. Based on the distribution of  
337 the VFs or ARGs in the pig farm and hospital *S. aureus* isolates, if an ARG or VF was detected in more than  
338 70% clonal lineages of the pig farm collection and in less than 30% clonal lineages of the hospital collection, as  
339 well as in more than 70% isolates of pig farm collection and in less than 30% isolates of hospital collection, the  
340 ARG was named as pig farm associated ARG (PFA-ARG) or pig farm associated VF (PFA-VF), conversely, it  
341 was named as hospital associated ARG (HA-ARG) or hospital associated VF (HA-VF).

### 342 **Multilocus sequence typing**

343 A database including all published alleles of the seven housekeeping gene fragments for *S. aureus* multilocus  
344 sequence typing (MLST) downloaded from [<https://pubmlst.org/>] was built to run the BLAST+ process. BLAST  
345 results yielding 100% homology were treated as the same alleles.

#### 346 **Isolates selected for phylogenetic analysis**

347 A total of 10,535 assembled *S. aureus* isolates were downloaded from the NCBI genome database (date up to  
348 Sep. 2019), MLST analysis was used to identify the clonal lineage of the isolates, all ST398 (for Chinese  
349 isolates, CC398 were all included) isolates were selected. 77 Chinese CC398 isolates from a previously  
350 published<sup>21</sup> were additionally included. The data was downloaded from the NCBI SRA database, and was then  
351 assembled using SPAdes 3.11.1<sup>37</sup>. Combined with the ST398 isolates from this study, a final collection  
352 consisted of 904 CC398 isolates. For all these CC398 isolates, CheckM was used to evaluate the assembly  
353 genomes, the genomes with higher than 1.0% contaminated and 0% strain heterogeneity (222 isolates) were  
354 excluded. According to the BioSample record of each ST398 isolate, 100 isolates with missing location or host  
355 information were also excluded. All 115 Chinese CC398 isolates (this study = 36, NCBI genome database = 37,  
356 NCBI SRA database = 42) were used for Chinese ST398 phylogenetic analysis. The isolates without the  
357 collection date record were also excluded, leaving 582 ST398 isolates (this study = 35, NCBI genome database  
358 = 505, NCBI SRA database = 42) as the international ST398 collection ([Table S2](#)).

#### 359 **Phylogenetic analysis of the Chinese CC398 isolates**

360 Snippy (version 4.4.5) [<https://github.com/tseemann/snippy>] was used to do the genome alignment of the 110  
361 Chinese ST398 isolates. The pig-farm ST398 MRSA in this study 0213-M-4A was used as the reference. Then,  
362 for the alignment file, a recombination-removal tool Gubbins (version 2.3.5)<sup>43</sup> was used to predict the  
363 recombination regions. All the recombination regions were marked as “N”, and for the alignment results, all the  
364 sites with more than one “N” or gap were trimmed off. For the filtered alignment result, RAxML-NG (version  
365 0.9.0)<sup>44</sup> was used to build the phylogenetic tree with 500 times bootstrap. A MRSA ST36 strain<sup>8</sup> (GenBank:  
366 BX571856.1) as well as a MRSA ST45 strain (GenBank: CP006044.1) were used as outgroups respectively to  
367 double check the root of the tree.

#### 368 **BEAST analysis of international ST398 isolates**

369 To determine the international phylogeny and molecular clock of ST398 isolates, BEAST 1.8.2<sup>22</sup> was used to  
370 perform the calculation. For the international ST398 collection (n = 582), a RAxML-NG tree was built  
371 following the pipeline as described above. Based on the phylogenetic tree, all the clades whose average branch  
372 length distance was below 0.00005 were collapsed. Each of the collapsed, as well as the un-collapsed, clades

373 was treated as an independent lineage. For the isolate(s) in each lineage, if the collected date and host and  
374 location information was the same, only one of the isolates was selected. Thus, 208 isolates (this study = 11,  
375 NCBI genome database = 168, NCBI SRA database = 29) were selected for the analysis with BEAST. Temporal  
376 signal of the 208 isolates was investigated using R script provided in the Murray et al., (2015)<sup>45</sup>. The results  
377 showed the positive correlation between genetic divergence and sampling time. For the alignment file of the 208  
378 isolates (0213-M-4A was the reference), the recombination regions were predicted with Gubbins and then  
379 masked as “N”, and all the sites containing “N” were removed. To account for different evolutionary processes  
380 acting at synonymous, non-synonymous, RNA, and non-coding sites<sup>46</sup>, the evolutionary model was partitioned  
381 into first and second, third, non-coding and RNA sites according to the reference strain 0213-M-4A. SNPs for  
382 each group and the number of the invariant nucleotide sites in each group were calculated, and the information  
383 was included in the analysis. For all partitions, we used an HKY +  $\Gamma$  substitution model with the uncorrelated  
384 lognormal relaxed clock model.

#### 385 **Phylogenetic analysis of the Chinese ST9 isolates**

386 For clarity, the isolate number from the study was reduced - for isolates from the same pig farm and same host,  
387 that have the same ARGs and VFs patterns and with less than 30 SNPs, only one isolate was selected. The CC9  
388 isolate 0213-P-3B with complete genomic sequence was used as the reference genome and a MRSA ST5 strain  
389 (GenBank: NC\_002745.2) as well as a ST97 isolate NCTC10344 (GenBank: LS483324.1) (not show in figure)  
390 were used as outgroups respectively to root the tree. The other approaches were the same as the phylogenetic  
391 analysis of the Chinese CC398 isolates that mentioned above.

#### 392 **The analysis of canSNP**

393 The presence of three canonical SNPs (canSNP) was identified for each ST398 genome as described by Stegger  
394 et al., (2013)<sup>10</sup> to determine if isolates were members of the human or livestock clades of LA-MRSA.

#### 395 **SCCmec identification**

396 The reference sequences of each reported *SCCmec* elements from I to XIV were collected as a database for  
397 *SCCmec* identification (Table S4). The mapping region with the identity higher than 80% in different contigs of  
398 a genome sequence were accumulated to calculate the *SCCmec* type coverage. For each isolate, from all the  
399 mapped reference *SCCmec* elements with higher than 70% overall coverage, the one with the highest coverage  
400 was identified as the *SCCmec* type of the isolate. The *SCCmec* typing results were double checked with the  
401 *SCCmecFinder*<sup>47</sup>, the results of the two methods were consistent.

#### 402 **Identification of other genomic elements**

403 Other genomic elements of the six ST398 isolates with complete genomic sequence were analysed to look for  
404 prophages and islands. PHASTER<sup>48</sup> was used to predict any prophage region, while IslandViewer 4<sup>49</sup> was used  
405 to detect any genomic island region. Searches for genomic elements including prophages, genomic islands,  
406 plasmids, and transposons among the whole *S. aureus* collection in this study was performed using BLAST to  
407 map regions of interest to the genome sequence of each isolate using an 80% threshold for identity.

#### 408 Accession numbers

409 All the *S. aureus* genomes sequenced in this study are available under the NCBI BioProject: PRJNA660925.

410

#### 411 Acknowledgements

412 This work was funded by the National Natural Science Foundation of China (NSFC) grant 81661138003 (to R.  
413 Z.), and the UK Medical Research Council grant MR/P007201/1 (to M.A.H., A.J.G. and A. W. T.).

414

#### 415 Reference

- 416 1. Lakhundi, S. & Zhang, K. Methicillin-Resistant Staphylococcus aureus: Molecular Characterization,  
417 Evolution, and Epidemiology. *Clinical microbiology reviews* vol. 31 1–103 (2018).
- 418 2. García-Álvarez, L. *et al.* Methicillin-resistant Staphylococcus aureus with a novel mecA homologue in  
419 human and bovine populations in the UK and Denmark: A descriptive study. *Lancet Infect. Dis.* **11**,  
420 595–603 (2011).
- 421 3. Aires-de-Sousa, M. Methicillin-resistant Staphylococcus aureus among animals: current overview. *Clin.*  
422 *Microbiol. Infect.* **23**, 373–380 (2017).
- 423 4. Voss, A., Loeffen, F., Bakker, J., Klaassen, C. & Wulf, M. Methicillin-resistant Staphylococcus aureus  
424 in Pig Farming. *Emerg. Infect. Dis.* **11**, 1965–1966 (2005).
- 425 5. van Cleef, B. A. G. L. *et al.* Livestock-associated methicillin-resistant staphylococcus aureus in humans,  
426 Europe. *Emerg. Infect. Dis.* **17**, 502–505 (2011).
- 427 6. Smith, T. C. *et al.* Methicillin-resistant Staphylococcus aureus (MRSA) strain ST398 is present in  
428 midwestern U.S. swine and swine workers. *PLoS One* **4**, 1–6 (2009).
- 429 7. Birgitte Borck Høg & Helle Korsgaard. DANMAP - Use of antimicrobial agents and occurrence of  
430 antimicrobial resistance in bacteria from food animals, food and humans in Denmark. 17–31 (2016).
- 431 8. Price, L. B. *et al.* Staphylococcus aureus CC398: Host Adaptation and Emergence of Methicillin  
432 Resistance in Livestock. *MBio* **3**, 1–7 (2012).
- 433 9. Ward, M. J. *et al.* Time-scaled evolutionary analysis of the transmission and antibiotic resistance  
434 dynamics of Staphylococcus aureus clonal complex 398. *Appl. Environ. Microbiol.* **80**, 7275–7282  
435 (2014).
- 436 10. Stegger, M. *et al.* Rapid differentiation between livestock-associated and livestock-independent  
437 staphylococcus aureus CC398 clades. *PLoS One* **8**, 1–5 (2013).
- 438 11. Zhou, W. *et al.* WGS analysis of ST9-MRSA-XII isolates from live pigs in China provides insights into  
439 transmission among porcine, human and bovine hosts. *J. Antimicrob. Chemother.* **73**, 2652–2661 (2018).
- 440 12. Wan, M. T., Lauderdale, T. L. & Chou, C. C. Characteristics and virulence factors of livestock  
441 associated ST9 methicillin-resistant Staphylococcus aureus with a novel recombinant staphylocoagulase  
442 type. *Vet. Microbiol.* **162**, 779–784 (2013).
- 443 13. Espinosa-Gongora, C. *et al.* Phenotypes and genotypes of old and contemporary porcine strains indicate  
444 a temporal change in the *S. aureus* population structure in pigs. *PLoS One* **9**, 1–5 (2014).
- 445 14. Sun, J., Yang, M., Sreevatsan, S. & Davies, P. R. Prevalence and Characterization of Staphylococcus  
446 aureus in Growing Pigs in the USA. *PLoS One* **10**, 1–14 (2015).
- 447 15. Cuny, C., Wieler, L. H. & Witte, W. Livestock-Associated MRSA: The impact on humans. *Antibiotics* **4**,  
448 521–543 (2015).
- 449 16. Matuszewska, M., Murray, G. G. R., Harrison, E. M., Holmes, M. A. & Weinert, L. A. The  
450 Evolutionary Genomics of Host Specificity in Staphylococcus aureus. *Trends Microbiol.* **28**, 465–477

- 451 (2020).
- 452 17. Cui, S. *et al.* Isolation and characterization of methicillin-resistant *Staphylococcus aureus* from swine  
453 and workers in China. *J. Antimicrob. Chemother.* **64**, 680–683 (2009).
- 454 18. Li, J. *et al.* Characterization of pig-associated methicillin-resistant *Staphylococcus aureus*. *Vet.*  
455 *Microbiol.* **201**, 183–187 (2017).
- 456 19. Sun, C. *et al.* Genomic analysis of *Staphylococcus aureus* along a pork production chain and in the  
457 community, Shandong Province, China. *Int. J. Antimicrob. Agents* **54**, 8–15 (2019).
- 458 20. Chen, H. *et al.* Whole-Genome Analysis of Livestock-Associated Methicillin-Resistant *Staphylococcus*  
459 *aureus* Sequence Type 398 Strains Isolated From Patients With Bacteremia in China. *J. Infect. Dis.* **221**,  
460 S220–S228 (2020).
- 461 21. He, L. *et al.* Detection and analysis of methicillin-resistant human-adapted sequence type 398 allows  
462 insight into community-associated methicillin-resistant *Staphylococcus aureus* evolution. *Genome Med.*  
463 **10**, 1–14 (2018).
- 464 22. Drummond, A. J., Suchard, M. A., Xie, D. & Rambaut, A. Bayesian phylogenetics with BEAUti and the  
465 BEAST 1.7. *Mol. Biol. Evol.* **29**, 1969–1973 (2012).
- 466 23. Jin, Y. *et al.* Characterization of highly virulent community-associated methicillin-resistant  
467 *Staphylococcus aureus* ST9-SCCmec XII causing bloodstream infection in China. *Emerg. Microbes*  
468 *Infect.* **9**, 2526–2535 (2020).
- 469 24. Li, C. R. *et al.* In vitro antibacterial activity of vertilmicin and its susceptibility to modifications by the  
470 recombinant AAC(6′)-APH(2′′) enzyme. *Antimicrob. Agents Chemother.* **52**, 3875–3882 (2008).
- 471 25. Kehrenberg, C. & Schwarz, S. Florfenicol-chloramphenicol exporter gene *fexA* is part of the novel  
472 transposon Tn558. *Antimicrob. Agents Chemother.* **49**, 813–815 (2005).
- 473 26. McMurry, L. M., Park, B. H., Burdett, V. & Levy, S. B. Energy-dependent efflux mediated by class L  
474 (TetL) tetracycline resistance determinant from streptococci. *Antimicrob. Agents Chemother.* **31**, 1648–  
475 1650 (1987).
- 476 27. Kumagai, R. *et al.* Quadruple or quintuple conversion of *hly*, *sak*, *sea* (or *sep*), *scn*, and *chp* genes by  
477 bacteriophages in non-β-hemolysin-producing bovine isolates of *Staphylococcus aureus*. *Vet. Microbiol.*  
478 **122**, 190–195 (2007).
- 479 28. Chabelskaya, S., Gaillot, O. & Felden, B. A *Staphylococcus aureus* small RNA is required for bacterial  
480 virulence and regulates the expression of an immune-evasion molecule. *PLoS Pathog.* **6**, 1–11 (2010).
- 481 29. Parisi, A. *et al.* MRSA in swine, farmers and abattoir workers in Southern Italy. *Food Microbiol.* **82**,  
482 287–293 (2019).
- 483 30. The European Union summary report on antimicrobial resistance in zoonotic and indicator bacteria from  
484 humans, animals and food in 2015. *EFSA J.* **15**, (2017).
- 485 31. The European Union summary report on antimicrobial resistance in zoonotic and indicator bacteria from  
486 humans, animals and food in 2017. *EFSA J.* **17**, (2019).
- 487 32. Wang, X. L. *et al.* Phenotypic and molecular characteristics of *Staphylococcus aureus* and methicillin-  
488 resistant *Staphylococcus aureus* in slaughterhouse pig-related workers and control workers in  
489 Guangdong Province, China. *Epidemiol. Infect.* **145**, 1843–1851 (2017).
- 490 33. Møller, J. K. *et al.* International travel as source of a hospital outbreak with an unusual methicillin-  
491 resistant *Staphylococcus aureus* clonal complex 398, Denmark, 2016. *Eurosurveillance* **24**, (2019).
- 492 34. Ying, G. G. *et al.* China Must Reduce Its Antibiotic Use. *Environ. Sci. Technol.* **51**, 1072–1073 (2017).
- 493 35. Hu, Y. & Cheng, H. Health risk from veterinary antimicrobial use in China’s food animal production  
494 and its reduction. *Environ. Pollut.* **219**, 993–997 (2016).
- 495 36. Wingett, S. W. & Andrews, S. Fastq screen: A tool for multi-genome mapping and quality control  
496 [version 1; referees: 3 approved, 1 approved with reservations]. *F1000Research* **7**, 1–13 (2018).
- 497 37. Bankevich, A. *et al.* SPAdes: A new genome assembly algorithm and its applications to single-cell  
498 sequencing. *J. Comput. Biol.* **19**, 455–477 (2012).
- 499 38. Parks, D. H., Imelfort, M., Skennerton, C. T., Hugenholtz, P. & Tyson, G. W. CheckM: Assessing the  
500 quality of microbial genomes recovered from isolates, single cells, and metagenomes. *Genome Res.* **25**,  
501 1043–1055 (2015).
- 502 39. Wick, R. R., Judd, L. M., Gorrie, C. L. & Holt, K. E. Unicycler: Resolving bacterial genome assemblies  
503 from short and long sequencing reads. *PLoS Comput. Biol.* **13**, 1–22 (2017).
- 504 40. Seemann, T. Prokka: Rapid prokaryotic genome annotation. *Bioinformatics* **30**, 2068–2069 (2014).
- 505 41. Gupta, S. K. *et al.* ARG-annot, a new bioinformatic tool to discover antibiotic resistance genes in  
506 bacterial genomes. *Antimicrob. Agents Chemother.* **58**, 212–220 (2014).
- 507 42. Camacho, C. *et al.* BLAST+: Architecture and applications. *BMC Bioinformatics* **10**, 1–9 (2009).
- 508 43. Croucher, N. J. *et al.* Rapid phylogenetic analysis of large samples of recombinant bacterial whole  
509 genome sequences using Gubbins. *Nucleic Acids Res.* **43**, e15 (2015).
- 510 44. Kozlov, A. M. *et al.* RAXML-NG: A fast, scalable and user-friendly tool for maximum likelihood



- 511 phylogenetic inference. *Bioinformatics* **35**, 4453–4455 (2019).  
512 45. Murray, G. G. R. *et al.* The effect of genetic structure on molecular dating and tests for temporal signal.  
513 80–89 (2016) doi:10.1111/2041-210X.12466.  
514 46. Bofkin, L. & Goldman, N. Variation in evolutionary processes at different codon positions. *Mol. Biol.*  
515 *Evol.* **24**, 513–521 (2007).  
516 47. Kaya, H. *et al.* SCCmecFinder, a Web-Based Tool for Typing of Staphylococcal Cassette Chromosome  
517 mec in *Staphylococcus aureus* Using Whole-Genome Sequence Data. *mSphere* **3**, 1–9 (2018).  
518 48. Arndt, D. *et al.* PHASTER: a better, faster version of the PHAST phage search tool. *Nucleic Acids Res.*  
519 **44**, W16–W21 (2016).  
520 49. Bertelli, C. *et al.* IslandViewer 4: Expanded prediction of genomic islands for larger-scale datasets.  
521 *Nucleic Acids Res.* **45**, W30–W35 (2017).  
522

523 **Figures and Tables**

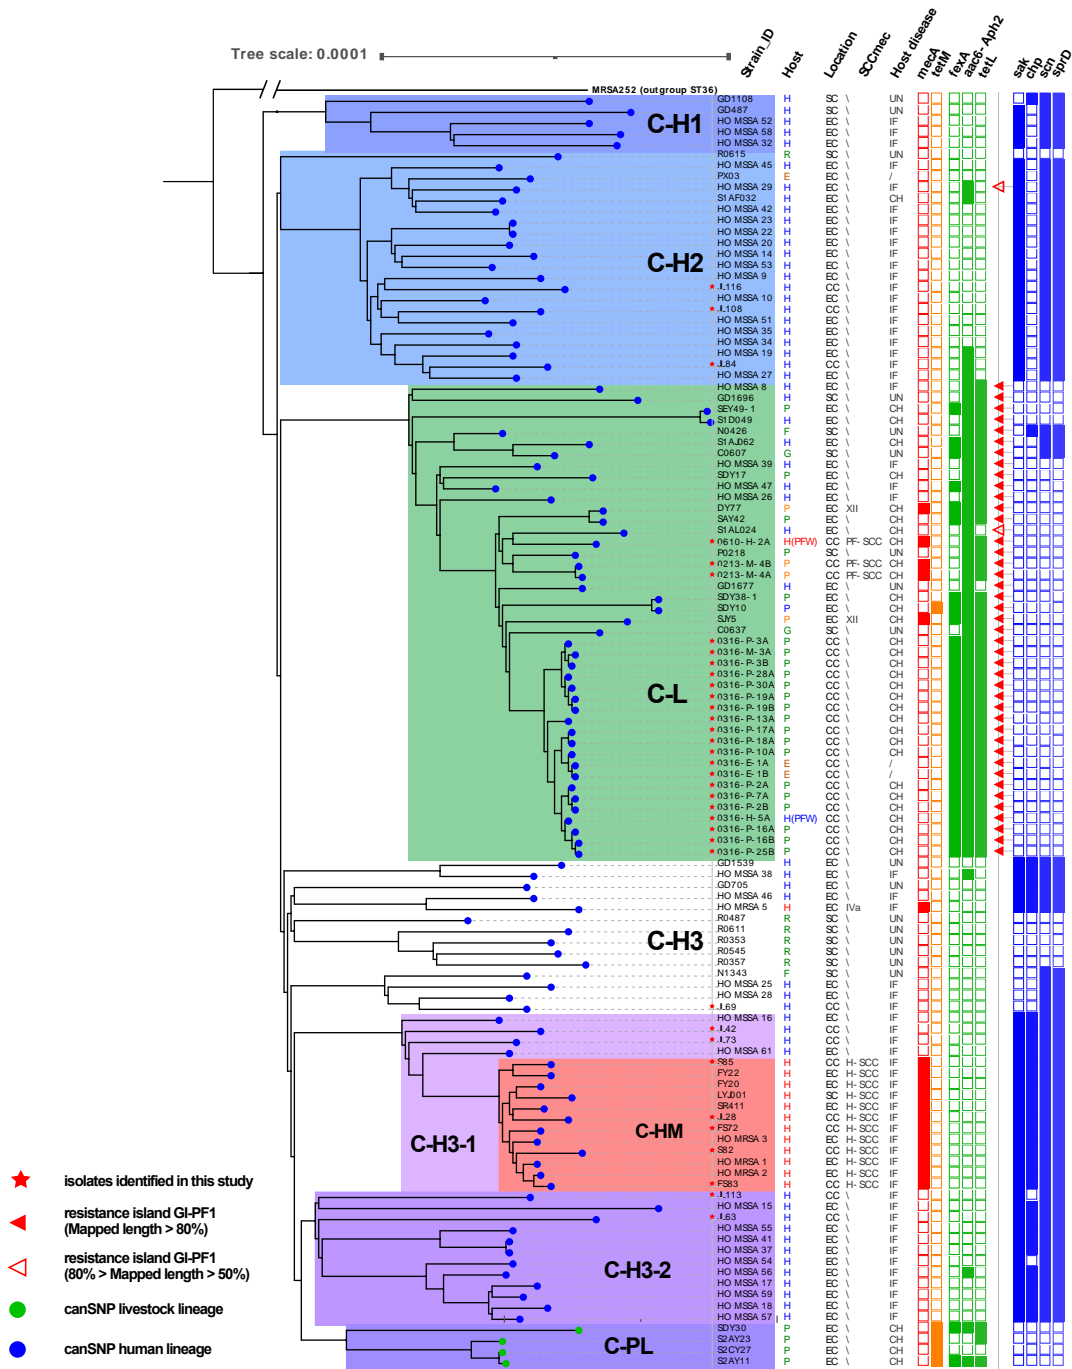

524 **Figure 1. The phylogenetic tree illustrates the relationship of the Chinese CC398 isolates.**  
 525 Based on whole genome SNPs, a phylogenetic tree including 115 Chinese CC398 isolates (107  
 526 ST398, 8 other STs) from this study and other published studies is shown. An MRSA ST36 strain  
 527 (GenBank: BX571856.1) was used as the out group. Location: EC, East China; SC, South China; CC,  
 528 Central China. Host: B, Bovine; H, Human; P, Porcine; F, Feline; R, Rodent; G, Galline/Chicken; E,  
 529 Environment; H(PFW), Human from a pig farm worker sample. SCCmec: For each isolate, the  
 530 SCCmec type was determined if more than 70% of SCCmec elements could be detected in the  
 531 genome. Some *mecA* negative isolates were found to have SCCmec elements using this method. Host  
 532 disease: UN, Unknown; IF, Infected with *S. aureus*; CH, Clinically healthy. ARGs and VFs: the filled  
 533 squares indicate the presence and empty squares the absence of individual genes indicated at the head  
 534 of each column.

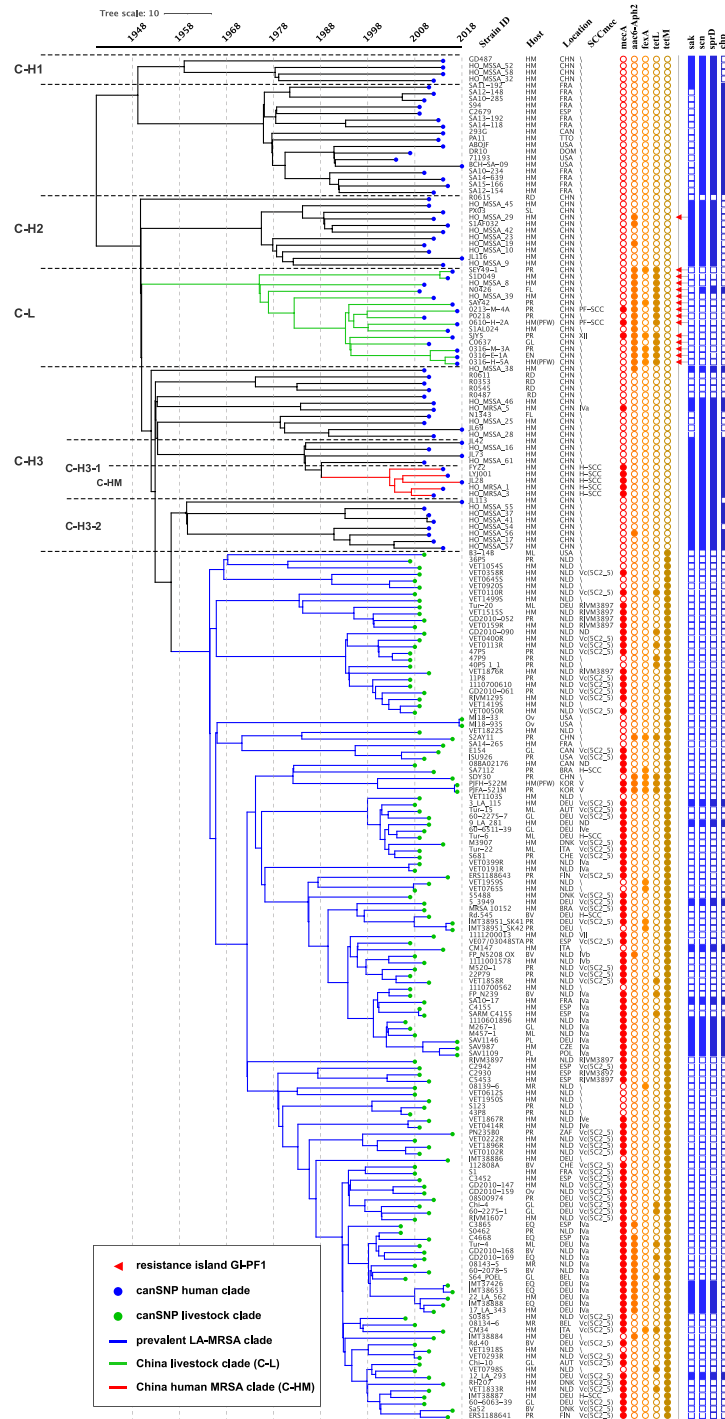

535

536 **Figure 2. Phylogeny and molecular dating of the international ST398 isolates.**

537 A time-measured phylogenetic tree using an international collection of ST398 isolates was obtained  
538 using BEAST2. A total of 207 ST398 isolates (11 from this study, and 196 from the NCBI genome  
539 collection) were used in the analysis. Host: HM, Human; PR, Porcine; EN, Environment; HM(PFW),  
540 Human from a pig farm worker; MR, Murine; BV, Bovine; GL, Galline; ML, Meleagrine; EQ,  
541 Equine; OV, Ovine; FL, Feline; RD, Rodentia; PL, Poultry. Location: DNK, Denmark; USA, United  
542 States of America; NLD, Netherlands; CHN, China; BEL, Belgium; CAN, Canada; DEU, Germany;  
543 CHE, Switzerland; ESP, Spain; AUT, Austria; ITA, Italy; DMA, Dominica; BRA, Brazil; TTO,  
544 Trinidad & Tobago; FIN, Finland; KOR, South Korea; ZAF, South Africa; FRA, France; POL,  
545 Poland; CZE, Czech Republic. SCCmec: For each isolate, the SCCmec type was determined if more  
546 than 70% of SCCmec elements could be detected in the genome.

Tree scale: 0.0001

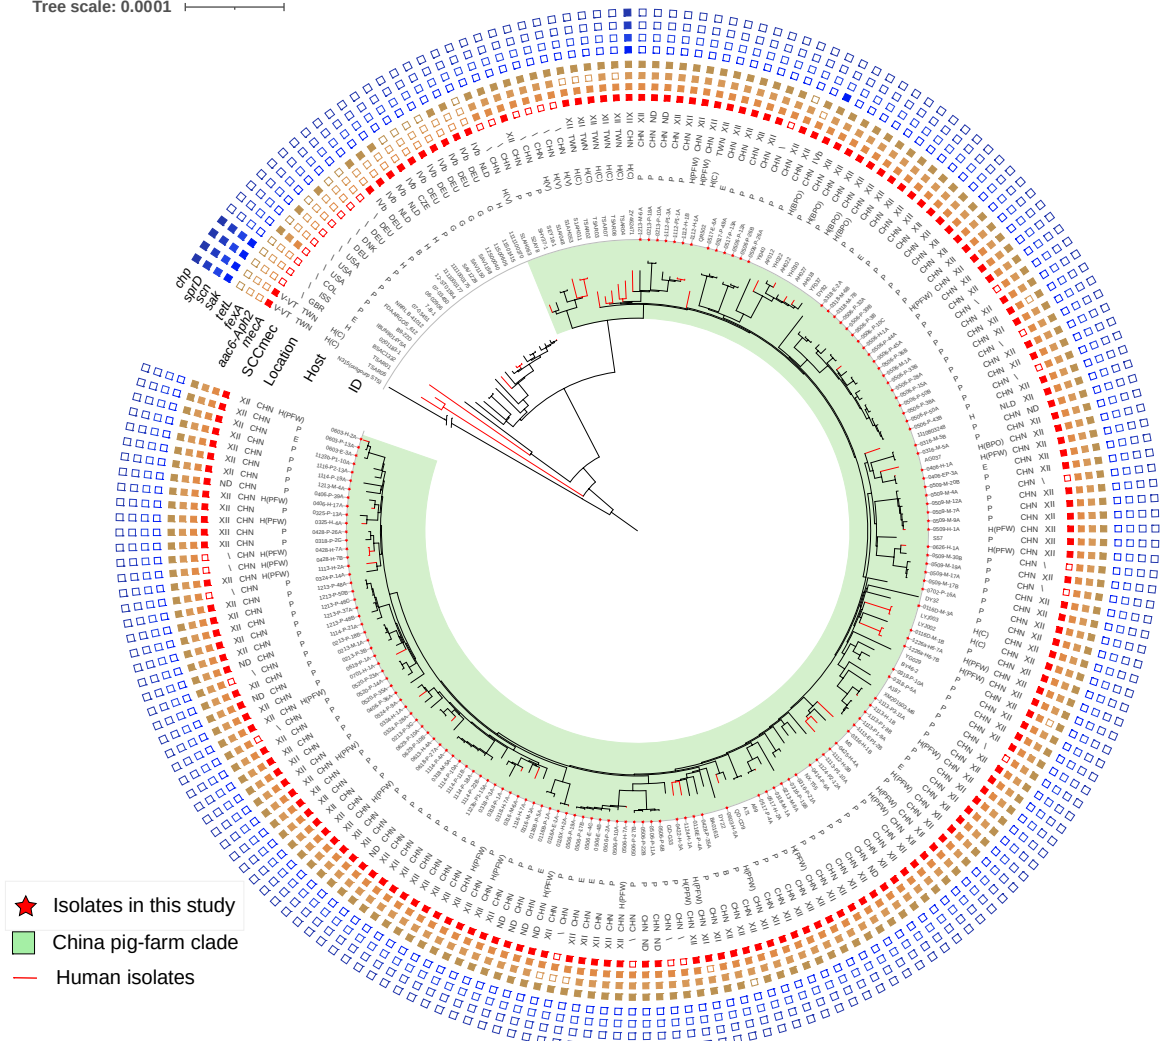

547

548 **Figure 3. The phylogenetic tree illustrates the relationship of the international ST9 isolates.**

549 Based on whole genome SNPs, a phylogenetic tree consisting of 144 isolates selected from this study

550 and 63 isolates from other reports is shown. A MRSA ST5 strain (GenBank: NC\_002745.2) was used

551 as the out group. Location: CHN, China; COL, Colombia; CZE, Czech Republic; DEU, Germany;

552 DNK, Denmark; GBR, United Kingdom; ISS, International Space Station Air (U.S. Lab); NLD,

553 Netherlands; TWN, Chinese Taiwan; USA, United States. Host: B, Bovine; E, Environment; G,

554 Galline/ Poultry; H, Human; H(C), from a human *S. aureus* infection clinical sample; H(BPO), from a

555 backyard pig farm owner sample; H(PFW), from a pig farm worker sample; H(V), from a village

556 community sample. P, Porcine. SCCmec: ND, *mecA* positive but not detected published SCCmec.

557 ARGs and VFs: the filled squares indicate the presence and empty squares the absence of individual

558 genes indicated at the head of each column.

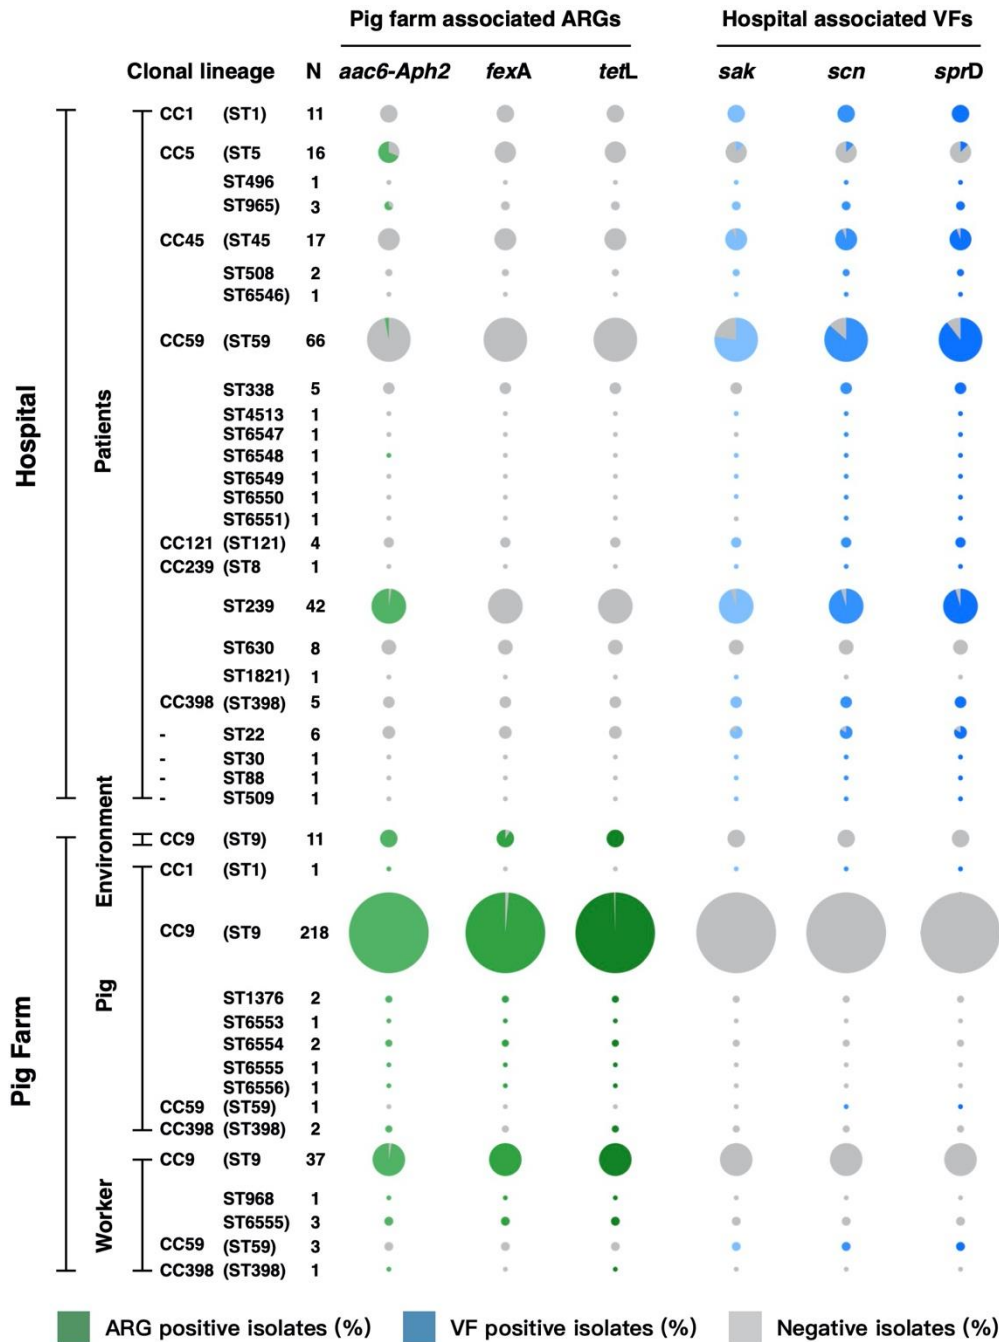

559

560 **Figure 4. Distribution of pig farm associated antimicrobial resistance genes and hospital**  
 561 **associated virulence factor genes among clonal lineages.**

562 The distribution of three antimicrobial resistance genes (ARGs) and three hospital associated  
 563 virulence factor genes (VFs) among clonal lineages of all isolates is shown. The pie charts in each  
 564 row, indicate the proportion of the isolates from each ST harboring individual ARGs or VFs as  
 565 defined by the column, with the size of each pie chart proportional to the number of isolates.

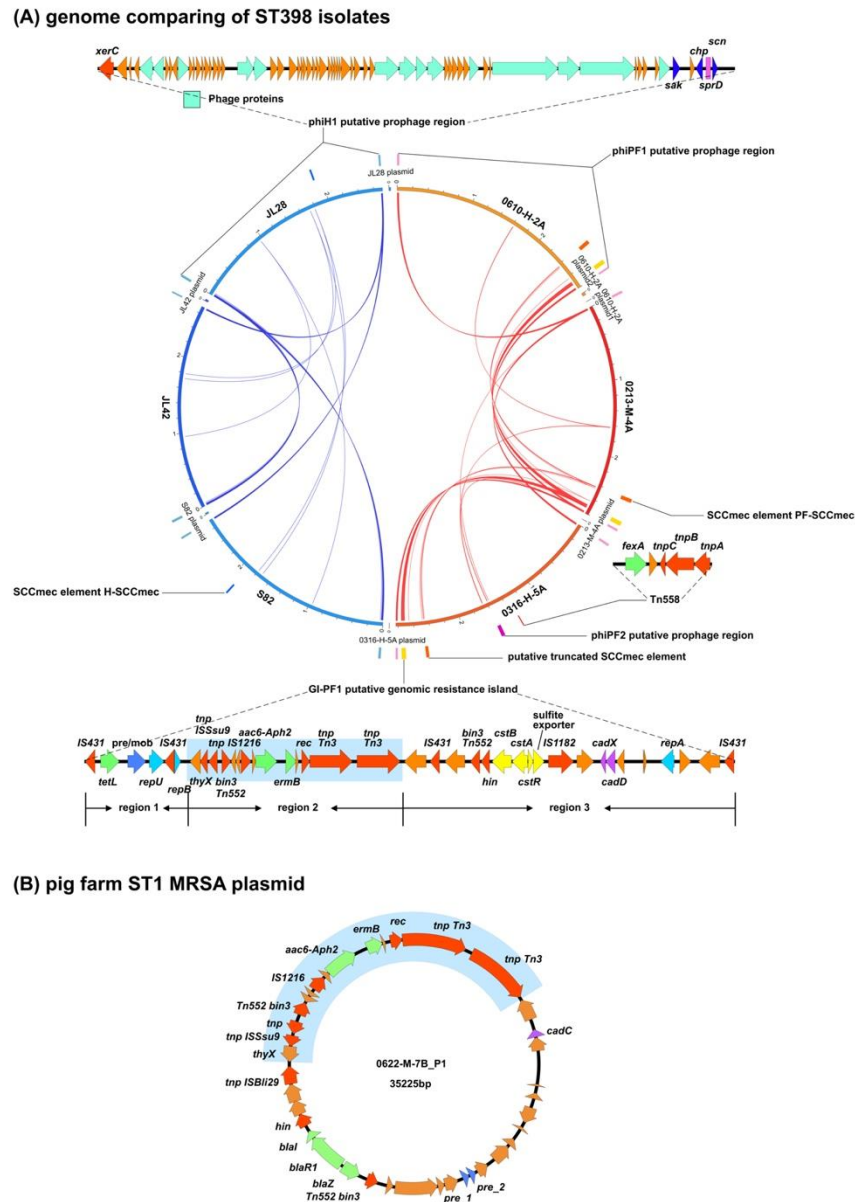

566

567 **Figure 5. Genomic elements carrying pig farm associated antimicrobial resistance genes and**  
 568 **hospital associated virulence factor genes.**

569 The genomic elements harboring the pig farm associated ARGs or hospital associated VFs were  
 570 identified by comparing the ST398 isolates of pig farms and hospitals. (A) The distribution of the  
 571 genomic elements in six ST398 completed genomes are shown: JL28, hospital ST398 MSSA isolate;  
 572 JL42 and S82, hospital ST398 MRSA isolates; 0213-M-4A: pig farm MRSA isolate from a sow nasal  
 573 sample; 0610-H-2A: pig farm MRSA isolate from a farm worker nasal sample; 0316-H-5A: pig farm  
 574 MSSA isolate from a farm worker nasal sample. The genomic sequences shared only between the  
 575 hospital isolates are indicated using blue curves, and genomic sequences shared only between the pig  
 576 farm isolates are indicated using red curved lines. Diagrammatic representations of the genomic  
 577 elements are illustrated, and their locations are shown adjacent to each genome included in the central  
 578 circular figure. Individual transposon associated genes are shaded red, ARGs are shaded green and  
 579 purple is used to show genes conferring resistance to metals. (B) The panel contains a diagram of a  
 580 plasmid from the ST1 pig farm isolate 0622-M-7B. When compared to the ST1 MRSA isolates from  
 581 the hospitals, the pig farm MRSA ST1 isolates had two additional ARGs, *aac6-Aph2* and *ermB*. These  
 582 two ARGs were found in a plasmid with a sequence that was identical with region 2 of the GI-PF1  
 583 identified in the pig farm ST398 isolates (highlighted in blue).

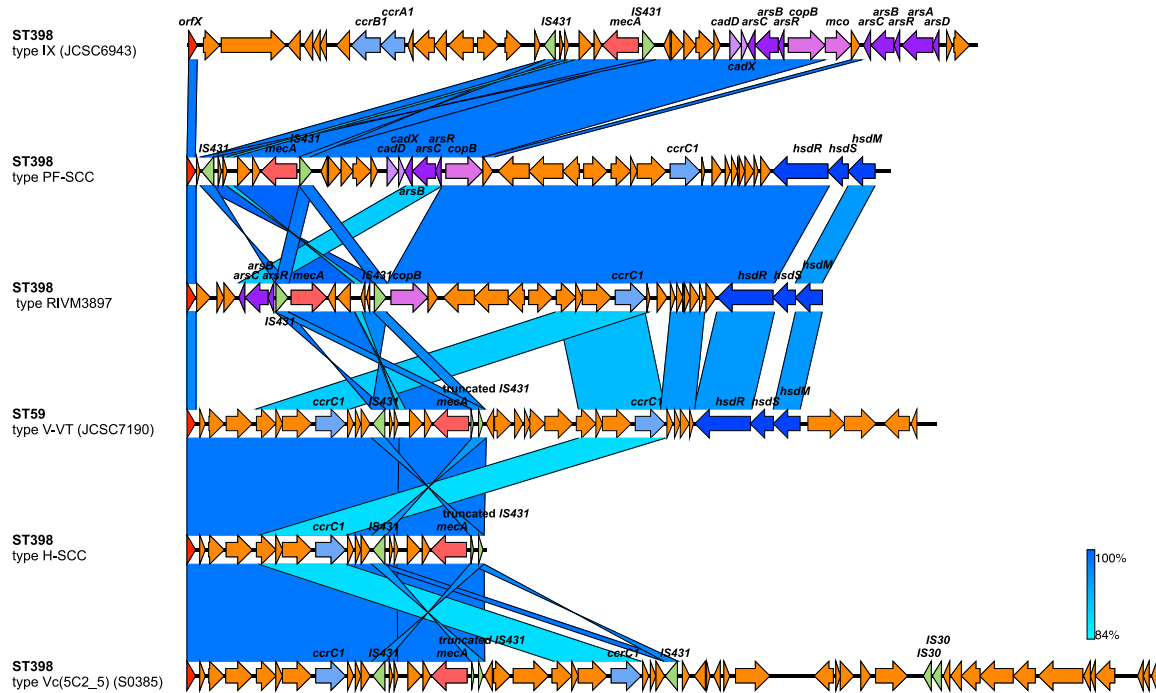

584

585 **Figure 6. Structures of SCCmec elements identified in ST398 MRSA isolates.**

586 The diagram shows the main genetic elements and regions of similarity between the SCCmec regions  
 587 found in MRSA in this study with reference SCCmec types. Sources of the SCCmecs were the  
 588 hospital MRSA ST398 isolate JL28 (H-SCC), and the pig farm MRSA ST398 isolate 0213-M-4A  
 589 (PF-SCC). Type V SCCmec from ST59 strain JCSC7190 (GenBank: AB512767), type IX SCCmec  
 590 from ST398 strain JCSC6943 (GenBank: AB505628), the SCCmec from MRSA ST398 strain  
 591 RIVM3897 (GenBank: CP013621.1; the SCCmec element was determined from 33795 to 69446 bp)  
 592 and SCCmec from ST398 strain S0835 (GenBank:AM990992.1; the SCCmec element was  
 593 determined from 33806 to 88218 bp) are shown for comparison. Regions of similarity (85% to 100%)  
 594 between each pair of elements are linked with blue bars where the intensity of shading illustrating the  
 595 degree of similarity.

596 **Table 1 The distribution of the whole *S. aureus* collection according to different sample sources.**

| Clonal complex | Sequence type | SCCmec type | Pig Farm    |      |             |      |      |      | Hospital |      |
|----------------|---------------|-------------|-------------|------|-------------|------|------|------|----------|------|
|                |               |             | Farm worker |      | Environment |      | Pig  |      | MRSA     | MSSA |
|                |               |             | MRSA        | MSSA | MRSA        | MSSA | MRSA | MSSA |          |      |
| CC1            | ST1           | IVb         | -           | -    | -           | -    | -    | -    | 11       | -    |
|                |               | IVc         | -           | -    | -           | -    | 1    | -    | -        | -    |
|                | -             | -           | -           | -    | -           | -    | 5    | -    | 6        |      |
|                | ST188         | -           | -           | -    | -           | -    | -    | -    | 16       |      |
| CC5            | ST6544        | -           | -           | -    | -           | -    | -    | -    | 1        |      |
|                | ST5           | IIa         | -           | -    | -           | -    | -    | 14   | -        |      |
|                |               | IVa         | -           | -    | -           | -    | -    | 2    | -        |      |
|                | -             | -           | -           | -    | -           | -    | 4    | -    | 4        |      |
|                | ST6           | -           | -           | -    | -           | -    | -    | -    | 5        |      |
|                | ST552         | -           | -           | -    | -           | -    | -    | -    | 1        |      |
|                | ST496         | IIa         | -           | -    | -           | -    | -    | 1    | -        |      |
|                | ST965         | IVc         | -           | -    | -           | -    | -    | 3    | -        |      |
| ST2114         | -             | -           | -           | -    | -           | -    | -    | 1    |          |      |
| CC9            | ST9           | XII         | 35          | -    | 9           | -    | 195  | -    | -        |      |
|                |               | ND          | 2           | -    | 2           | -    | 23   | -    | -        |      |
|                | -             | -           | 2           | -    | -           | -    | 14   | -    | -        |      |
|                | ST6553        | XII         | -           | -    | -           | -    | 1    | -    | -        |      |
|                | ST6554        | XII         | -           | -    | -           | -    | 2    | -    | -        |      |
|                | ST6555        | XII         | 3           | -    | -           | -    | 1    | -    | -        |      |
|                | ST6556        | XII         | -           | -    | -           | -    | 1    | -    | -        |      |
|                | ST968         | ND          | 1           | -    | -           | -    | -    | -    | -        |      |
|                | ST1376        | XII         | -           | -    | -           | -    | 2    | -    | -        |      |
|                | CC45          | ST45        | IVa         | -    | -           | -    | -    | -    | 17       | -    |
| ST508          |               | IVi         | -           | -    | -           | -    | -    | 2    | -        |      |
| -              |               | -           | -           | -    | -           | -    | -    | -    | 1        |      |
| CC59           | ST6546        | IVi         | -           | -    | -           | -    | -    | 1    | -        |      |
|                | ST59          | IVa         | 3           | -    | -           | -    | -    | 48   | -        |      |
|                |               | IVb         | -           | -    | -           | -    | -    | 5    | -        |      |
|                | -             | V-VT        | -           | -    | -           | -    | 1    | 13   | -        |      |
|                | ST6547        | IVa         | -           | -    | -           | -    | -    | 1    | -        |      |
|                | ST6548        | IVa         | -           | -    | -           | -    | -    | 1    | -        |      |
|                | ST6549        | IVg         | -           | -    | -           | -    | -    | 1    | -        |      |
|                | ST6550        | IVa         | -           | -    | -           | -    | -    | 1    | -        |      |
|                | ST6551        | IVa         | -           | -    | -           | -    | -    | 1    | -        |      |
|                | ST338         | V-VT        | -           | -    | -           | -    | -    | 5    | -        |      |
|                | ST4513        | IVa         | -           | -    | -           | -    | -    | 1    | -        |      |
|                | CC121         | ST121       | V           | -    | -           | -    | -    | -    | 4        | -    |
|                |               | -           | -           | -    | -           | -    | -    | -    | -        | 4    |
| CC239          | ST6543        | -           | -           | -    | -           | -    | -    | -    | 1        |      |
|                | ST8           | IVa         | -           | -    | -           | -    | -    | 1    | -        |      |
|                | ST239         | III         | -           | -    | -           | -    | -    | 42   | -        |      |
|                | ST623         | -           | -           | -    | -           | -    | -    | -    | 1        |      |
|                | ST630         | H-SCC       | -           | -    | -           | -    | -    | -    | 2        | -    |
|                |               | V           | -           | -    | -           | -    | -    | -    | 6        | -    |
|                | -             | -           | -           | -    | -           | -    | -    | -    | 2        |      |
|                | CC398         | ST1821      | V           | -    | -           | -    | -    | -    | 1        | -    |
| ST398          |               | H-SCC       | -           | -    | -           | -    | -    | 5    | -        |      |
|                |               | PF-SCC      | 1           | -    | -           | -    | 2    | -    | -        |      |
| -              |               | -           | 1           | -    | 2           | -    | 17   | -    | 7        |      |
| CC1281         | ST6545        | -           | -           | -    | -           | -    | -    | -    | 1        |      |
|                | ST1281        | -           | -           | 1    | -           | -    | 4    | -    | 1        |      |
|                | ST2631        | -           | -           | -    | -           | -    | -    | -    | 1        |      |
| -              | ST7           | -           | -           | -    | -           | -    | -    | -    | 2        |      |
| -              | ST15          | -           | -           | -    | -           | -    | -    | -    | 1        |      |
| -              | ST22          | IVa         | -           | -    | -           | -    | -    | 1    | -        |      |
|                |               | V-VT        | -           | -    | -           | -    | -    | 5    | -        |      |
| -              | -             | -           | -           | -    | -           | -    | -    | 3    |          |      |
| -              | ST25          | -           | -           | -    | -           | -    | -    | -    | 8        |      |
| -              | ST30          | IVc         | -           | -    | -           | -    | -    | 1    | -        |      |
| -              | ST88          | V-VT        | -           | -    | -           | -    | -    | 1    | -        |      |
| -              | ST509         | IVa         | -           | -    | -           | -    | -    | 1    | -        |      |
| -              | ST672         | -           | -           | -    | -           | -    | -    | -    | 1        |      |
| -              | ST944         | -           | -           | -    | -           | -    | -    | -    | 2        |      |

597  
598  
599

ND: not detected  
H-SCCmec: the SCCmec identified in the hospital ST398 MRSA isolates in this study  
PF-SCCmec: the SCCmec identified in the pig farm ST398 MRSA isolates in this study
